# Supplementary material for: Posttranscriptional Gene Regulation by Spatial Rearrangement of the 3′ Untranslated Region
Source: PLoS Biol. 2008 Apr 29;6(4):e92. doi: 10.1371/journal.pbio.0060092 (PMC2689704; doi:10.1371/journal.pbio.0060092)
Supplement: Figure S5 — Relative miniμ mRNA levels from the constructs indicated in Figure 4A, normalized and displayed as in Figure 4C, from cells treated (+CHX) or not (control) with 100 μg/mL cycloheximide for 4 h before RNA isolation. Average values and SD of five qPCR measurements from two independent experiments are shown. (241 KB PDF) [file pbio.0060092.sg005.pdf]

# miniµ foldback and control constructs

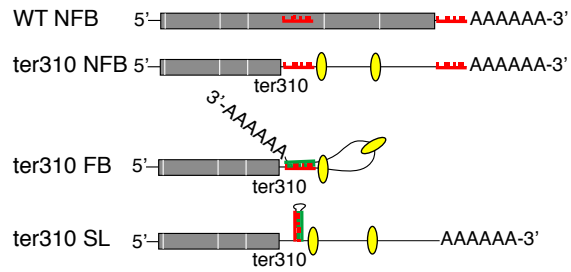

## mRNA increase upon cycloheximide

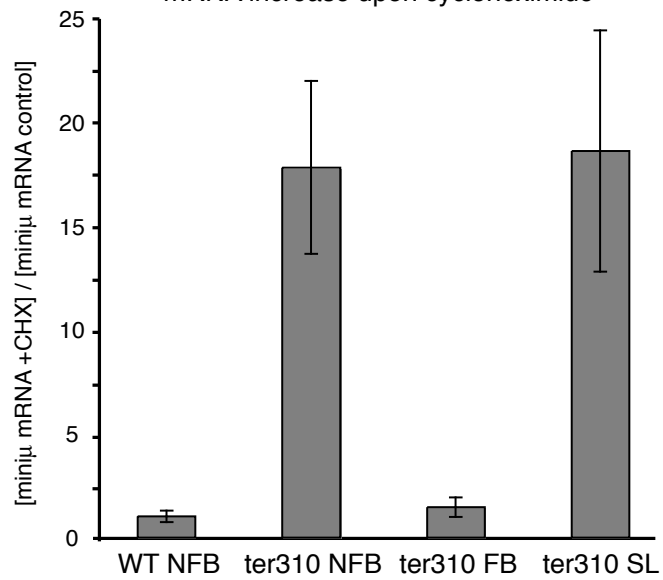

rel. µ mRNA

|         |              |            |             |            |
|---------|--------------|------------|-------------|------------|
| control | 100 ± 0      | 1.8 ± 0.3  | 42.0 ± 9.4  | 1.4 ± 0.26 |
| + CHX   | 102.8 ± 27.1 | 32.8 ± 4.6 | 62.2 ± 14.7 | 26.8 ± 6.8 |
